# Supplementary material
Source: Royal Society of Chemistry journal article supplement (doi:10.1039/d6ta02777f)
Supplement: d6ta02777f1.pdf [file d6ta02777f1.pdf]

## Electronic Supplementary Information

### Experimental section

**Materials:** Iron (III) nitrate nonahydrate ( $\text{Fe}(\text{NO}_3)_3 \cdot 9\text{H}_2\text{O}$ ), ammonium fluoride ( $\text{NH}_4\text{F}$ ), urea ( $\text{CH}_4\text{N}_2\text{O}$ ), sodium carbonate ( $\text{Na}_2\text{CO}_3$ ), potassium hydroxide ( $\text{KOH}$ ), 2,5-dihydroxyterephthalic acid (DHTA, 98 wt.%), N,N-dimethylformamide (DMF,  $\geq 99$  wt.%), and Nafion (5 wt.%) were purchased from Shanghai Maclin Biochemical Technology Co., Ltd. Nickel nitrate hexahydrate ( $\text{Ni}(\text{NO}_3)_2 \cdot 6\text{H}_2\text{O}$ ), hydrochloric acid ( $\text{HCl}$ ), and ethanol ( $\text{C}_2\text{H}_5\text{OH}$ ) were purchased from Beijing Chemical Reagent Co., Ltd (Beijing, China). Ruthenium oxide ( $\text{RuO}_2$ ) and commercial Pt/C (20 wt.%) was obtained from Aladdin Ltd. (Shanghai, China). Ni foam (NF) was purchased from Shenzhen Green and Creative Environmental Science and Technology Co., Ltd. Natural seawater was collected from Qingdao, Shandong, China, and most of the magnesium and calcium salts were removed by adding 6.8 g  $\text{Na}_2\text{CO}_3$  in 1 L natural seawater before use. Ultrapure water was used throughout.

**Preparation of NiFe LDH/NF:** Firstly, a piece of NF ( $2.0 \times 3.0 \text{ cm}^2$ ) was subjected to sequential ultrasonic cleaning with  $\text{HCl}$ , ethanol, and ultrapure water, at least for 15 min for each step. The pretreated NF was then immersed in a solution composition  $\text{Ni}(\text{NO}_3)_2 \cdot 6\text{H}_2\text{O}$  (0.291 g),  $\text{Fe}(\text{NO}_3)_3 \cdot 9\text{H}_2\text{O}$  (0.404 g),  $\text{CO}(\text{NH}_2)_2$  (0.90 g),  $\text{NH}_4\text{F}$  (0.74 g), and ultrapure water (35 mL) in a Teflon-lined autoclave, heated at  $120 \text{ }^\circ\text{C}$  for 6 h to get NiFe LDH/NF. Subsequently, NF deposited with NiFe LDH was taken out, repeatedly washed with ethanol and water, dried at  $60 \text{ }^\circ\text{C}$  for 2 h.

**Preparation of NiFe LDH@DHTA/NF:** Firstly, 1.5 mmol 2,5-dihydroxyterephthalic acid (DHTA) was dissolved in the mixed solution of 28 mL DMF, 2 mL ethanol, and 2 mL ultrapure water, and sonicated for 30 min to form a homogeneous solution. Secondly, the as-prepared NiFe LDH/NF was immersed in the above solution for 30 min. Finally, the sample was washed and then dried at  $60 \text{ }^\circ\text{C}$  to obtain NiFe LDH@DHTA/NF.

**Preparation of  $\text{RuO}_2/\text{NF}$  and  $\text{Pt}/\text{C}/\text{NF}$ :** 5 mg  $\text{RuO}_2$  (or Pt/C) was added into a solution containing 30  $\mu\text{L}$  of Nafion, 485  $\mu\text{L}$  of ethanol, and 485  $\mu\text{L}$  of ultrapure water

---

with the aid of ultrasonication (30 min) to form a homogeneous ink ( $5 \text{ mg mL}^{-1}$ ). 300  $\mu\text{L}$  of catalyst ink was dropped onto a piece of cleaned NF ( $0.5 \times 0.5 \text{ cm}^2$ ) with a loading mass of 1.5 mg.

**Characterizations:** Surface morphology and microstructure of the samples were observed by a scanning electron microscope (Gemini SEM 300, ZEISS, Germany), a transmission electron microscope (TEM, Zeiss Libra 200FE), and a high-resolution TEM (HRTEM, FEI Tecnai G2 F20). XRD data were acquired via X-ray diffraction (XRD, Philip D8) with Cu  $K\alpha$  source ( $\lambda = 1.54056 \text{ \AA}$ ). Raman spectroscopy was recorded on the Lab RAM HR Evolution confocal microscope with a 532 nm laser. X-ray photoelectron spectroscopy (XPS, ESCALAB 250 Xi) was utilized to research the morphology and compositions of samples. Fourier transform infrared (FT-IR) spectra were collected on the Nexus 670. Absorbance data were acquired on a UV-vis spectrophotometer (Shimadzu UV-2700).

**Electrochemical measurements:** All electrochemical tests were performed using a three-electrode system on a CHI660E electrochemical workstation. Electrochemical properties of the samples were measured in a three-electrode configuration with the working electrode (NiFe LDH@DHTA/NF), counter electrode (carbon rod), reference electrode (Hg/HgO), and 1 M KOH + seawater aqueous electrolyte. Linear sweep voltammetry (LSV) tests were conducted from 0 to 1.4 V at a scan rate of  $5 \text{ mV s}^{-1}$ . Electrochemical impedance spectroscopy (EIS) was performed in the range of  $10^5$  to 0.01 Hz with an amplitude of 5 mV in 1 M KOH + seawater. The capacitance of the double layer ( $C_{dl}$ ) was determined in 1 M KOH + seawater via cyclic voltammetry (CV) at different scan rates ranging from 20 to  $120 \text{ mV s}^{-1}$ . According to the Nernst equation ( $E_{\text{RHE}} = E_{\text{Hg/HgO}} + 0.059 \times \text{pH} + 0.098 \text{ V}$ ), all potentials in this work were converted to the reversible hydrogen electrode (RHE) scale. The  $iR$ -corrected potential was calculated based on the measured solution resistance using the equation  $E_{\text{corr}} = E - iR$ , where  $E$  is the original potential,  $R$  is the solution resistance,  $i$  is the corresponding current, and  $E_{\text{corr}}$  stands for the  $iR$ -compensated potential.

**Detection of active chlorine:** The concentration of active chlorine in the electrolyte was determined by the DPD method using a UV-Vis spectrophotometer (J. G. Vos

---

and M. T. M. Koper, *J. Electroanal. Chem.*, 2018, **819**, 260–268). Briefly, 100  $\mu\text{L}$  of the electrolyte was sequentially mixed with 50  $\mu\text{L}$  of 1.0 mol L<sup>-1</sup> H<sub>2</sub>SO<sub>4</sub>, 50  $\mu\text{L}$  of 2.0 mol L<sup>-1</sup> NaOH, and 4.8 mL of ultrapure water. Subsequently, 250  $\mu\text{L}$  of DPD reagent and 250  $\mu\text{L}$  of PBS buffer (pH = 6.5) were added to the mixture. After standing for 2 minutes, the solution turned transparent pink, and the absorbance at 550 nm was measured via UV-Vis absorption spectroscopy to quantify the concentration of active chlorine.

**Computational details:** All density functional theory (DFT) calculations were completed based on the DMol3 module. The Perdew–Burke–Ernzerhof functional within the generalized gradient approximation was adopted to describe the electron exchange–correlation energy. A double numerical basis set with polarization functions was selected as the atomic orbital basis set. To accurately characterize long-range weak interactions, the DFT-D dispersion correction proposed by Grimme was introduced in the calculations. The convergence criteria for geometric optimization were set as follows: the energy tolerance less than  $1.0 \times 10^{-5}$  Ha, the maximum atomic force less than 0.002 Ha/Å, and the maximum atomic displacement less than 0.005 Å. The self-consistent field convergence threshold was set to  $1.0 \times 10^{-6}$  Ha.

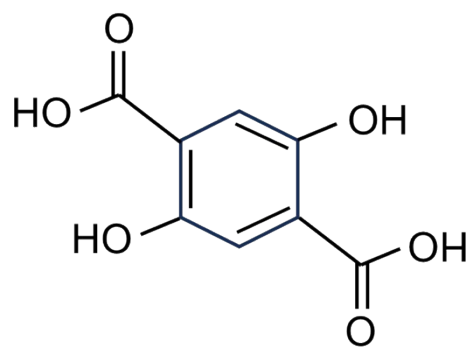

**Fig. S1.** Chemical structure of DHTA.

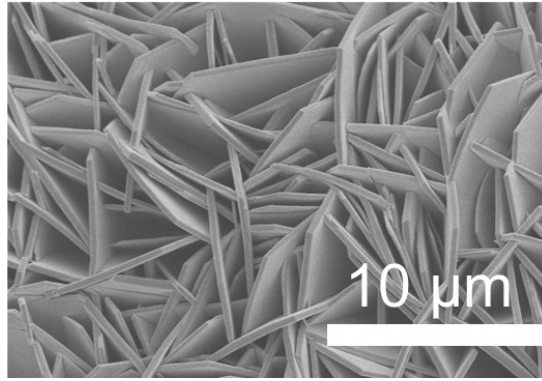

**Fig. S2.** Low-magnification SEM image of NiFe LDH@DHTA/NF.

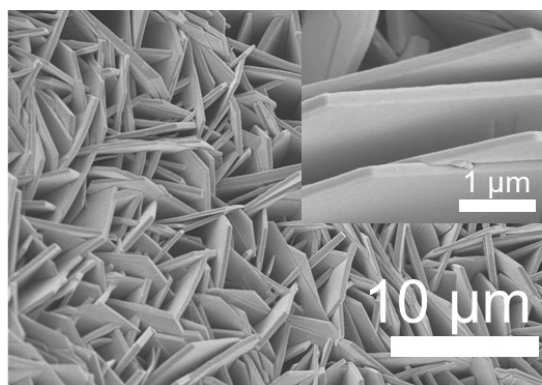

**Fig. S3.** Low-magnification SEM image of NiFe LDH/NF (inset: high-magnification SEM image).

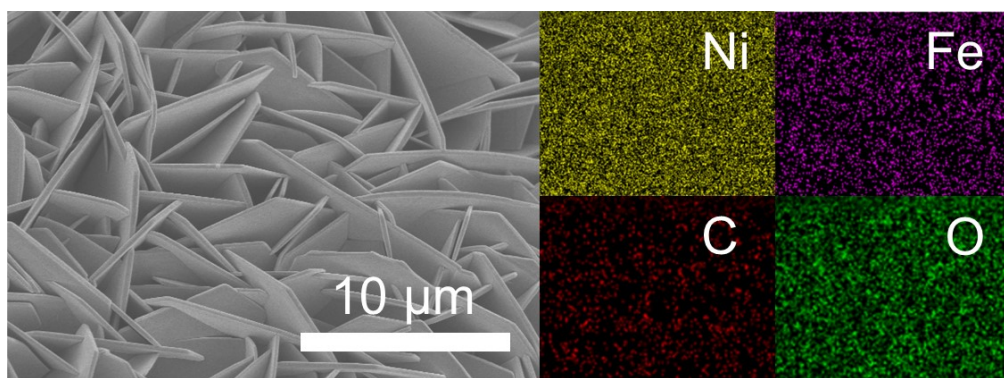

**Fig. S4.** SEM and corresponding EDX elemental mapping images of NiFe LDH@DHTA/NF.

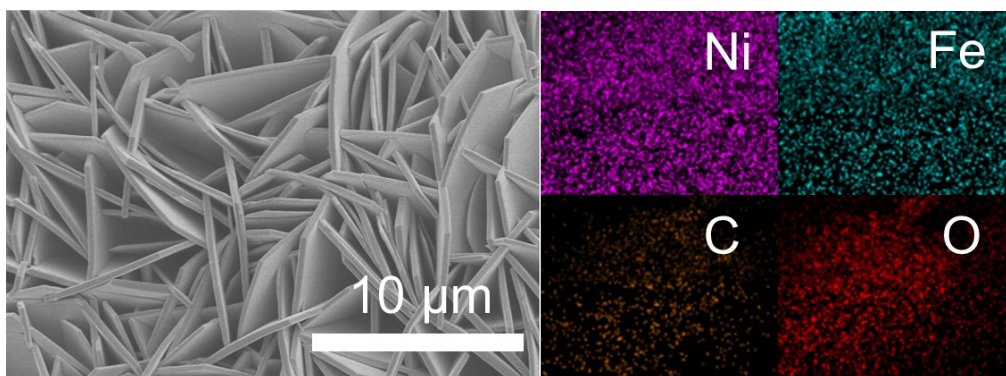

**Fig. S5.** SEM and corresponding EDX elemental mapping images of NiFe LDH/NF.

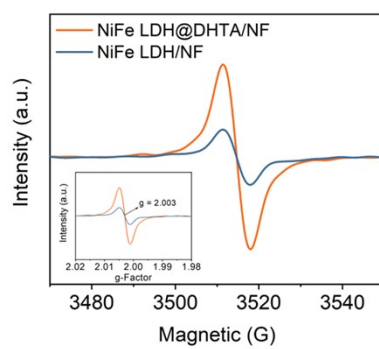

**Fig. S6.** EPR spectra of NiFe LDH@DHTA/NF and NiFe LDH/NF. (The inset displays the g-factor region.)

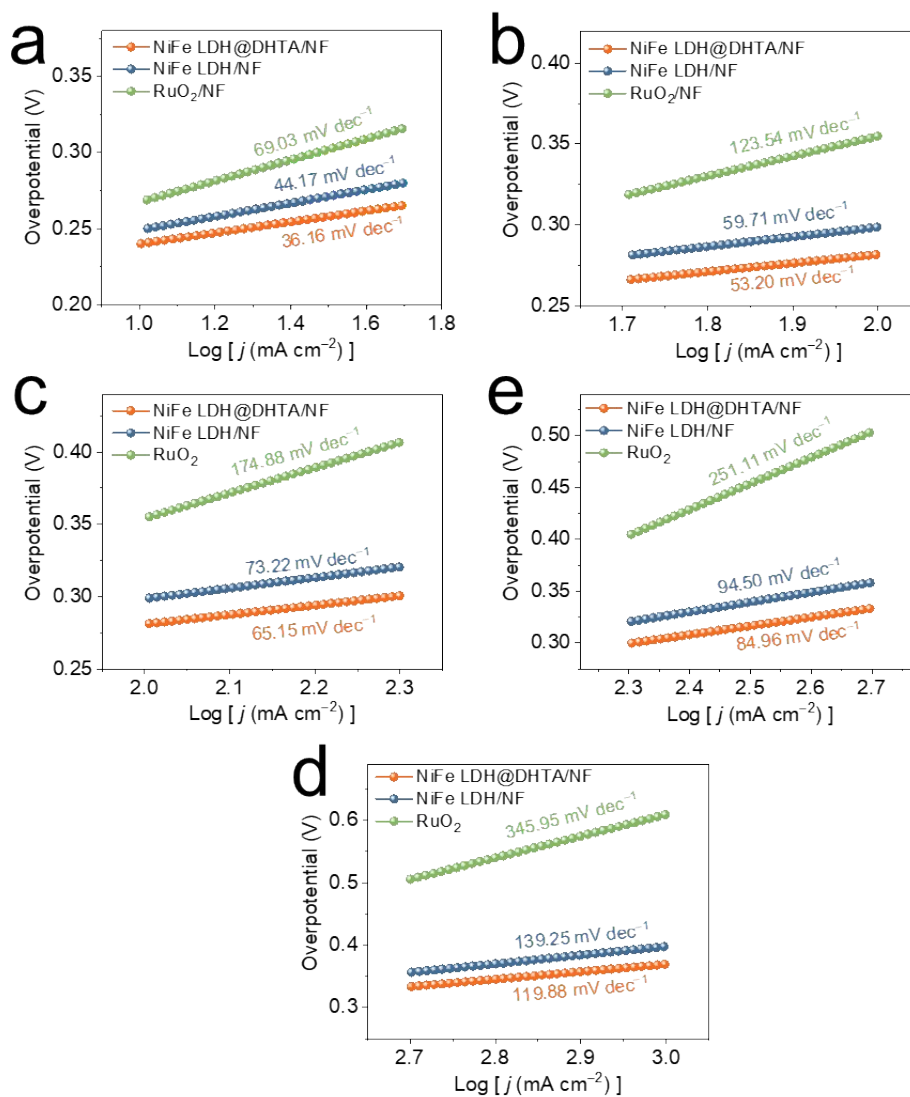

**Fig. S7.** Tafel plots of NiFe LDH@DHTA/NF at different current density ranges in 1 M KOH + seawater (a) 10-50, (b) 50-100, (c) 100-200, (d) 200-500, and (e) 500-1000 mA cm<sup>-2</sup>.

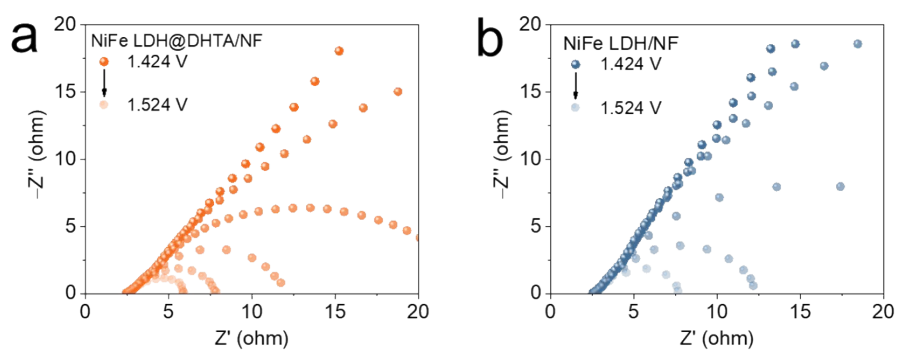

**Fig. S8.** Nyquist plots at various voltages of (a) NiFe LDH@DHTA/NF and (b) NiFe LDH/NF.

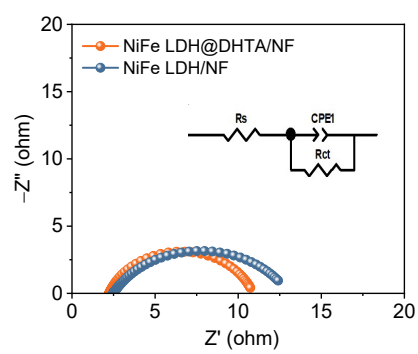

**Fig. S9.** Nyquist plots of NiFe LDH@DHTA/NF and NiFe LDH/NF.

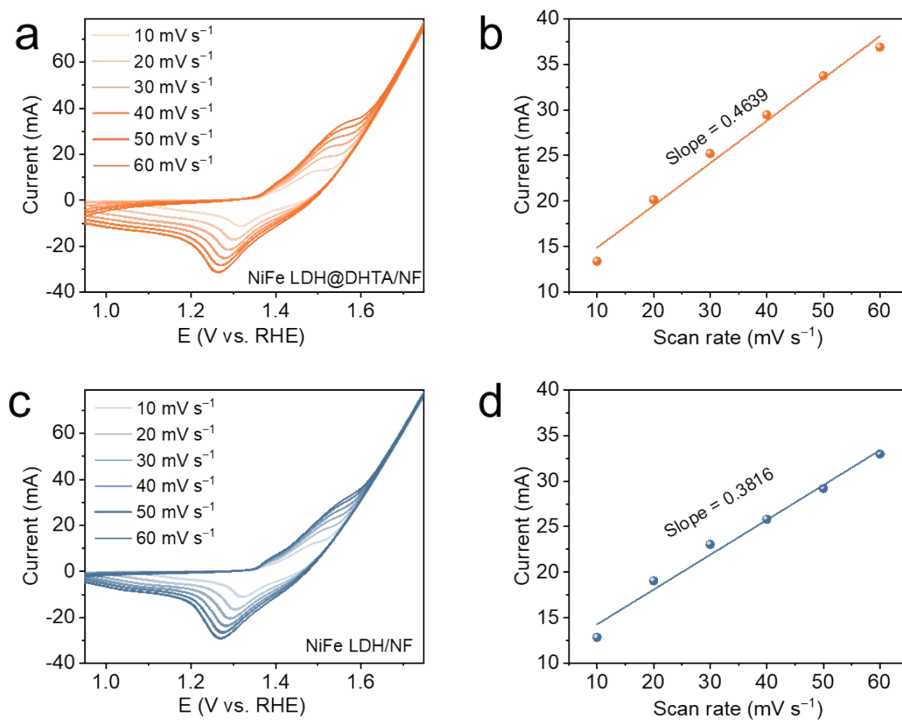

**Fig. S10.** CV curves for (a) NiFe LDH@DHTA/NF and (c) NiFe LDH/NF at different scan rates increasing from 10 to 60 mV s<sup>-1</sup> in 1 M KOH + seawater. Oxidation peak current versus scan rate plots for (b) NiFe LDH@DHTA/NF and (d) NiFe LDH/NF.

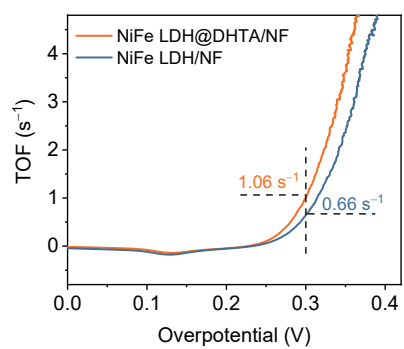

**Fig. S11.** TOF plots of NiFe LDH@DHTA/NF and NiFe LDH/NF.

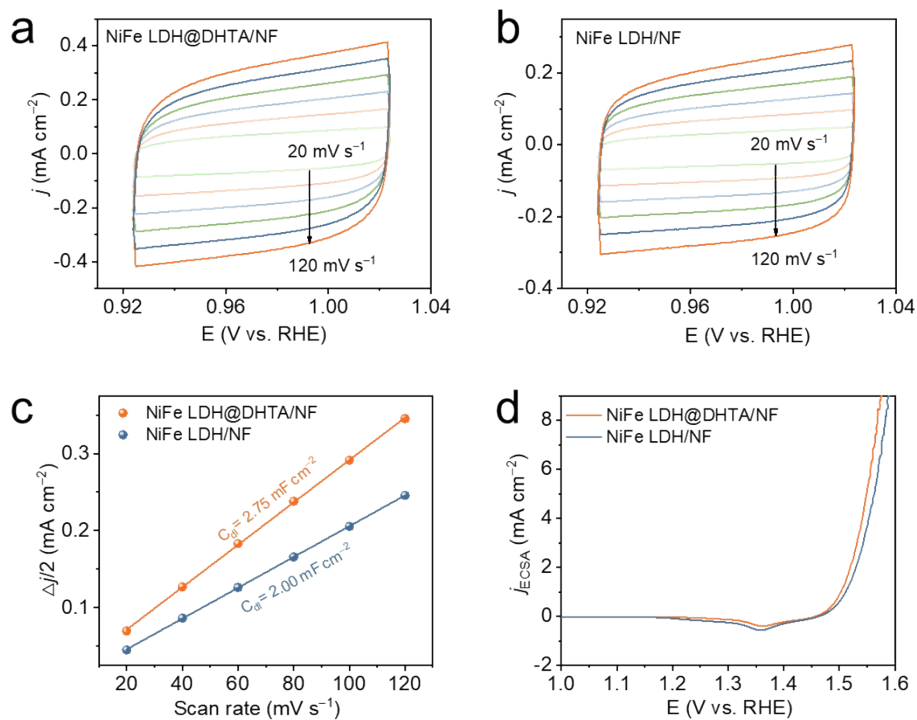

**Fig. S12.** CV curves of (a) NiFe LDH@DHTA/NF and (b) NiFe LDH/NF in the double layer region at different scan rates of 20, 40, 60, 80, 100, and 120 mV s<sup>-1</sup> in 1 M KOH + seawater. (c) Comparison of  $C_{dl}$  values for NiFe LDH@DHTA/NF and NiFe LDH/NF electrodes. (d) LSV curves in 1 M KOH + seawater for NiFe LDH@DHTA/NF and NiFe LDH/NF normalized by the electrochemical active surface area.

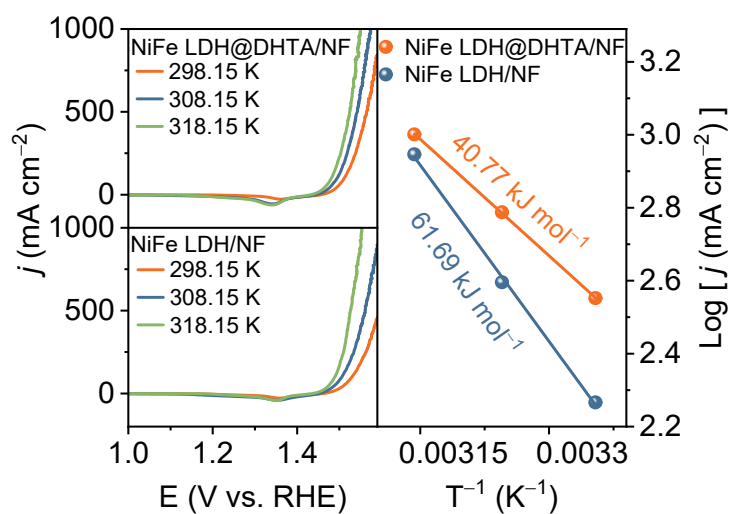

**Fig. S13.** LSV curves of NiFe LDH@DHTA/NF and NiFe LDH/NF toward OER at different temperatures and Arrhenius plots of the kinetic currents at  $\eta_{1000}$  for NiFe LDH@DHTA/NF and NiFe LDH/NF.

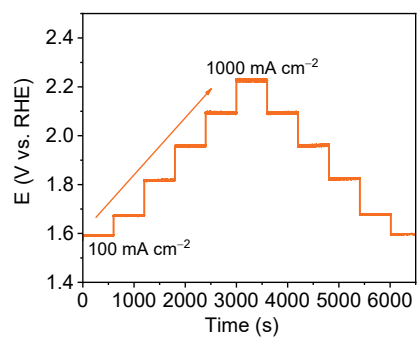

**Fig. S14.** Multistep chronoamperometry curve of NiFe LDH@DHTA/NF without iR correction in 1 M KOH + seawater.

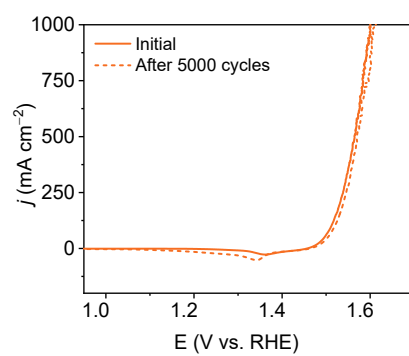

**Fig. S15.** LSV curves of NiFe LDH@DHTA/NF before and after 5000 CV cycles in 1 M KOH + seawater.

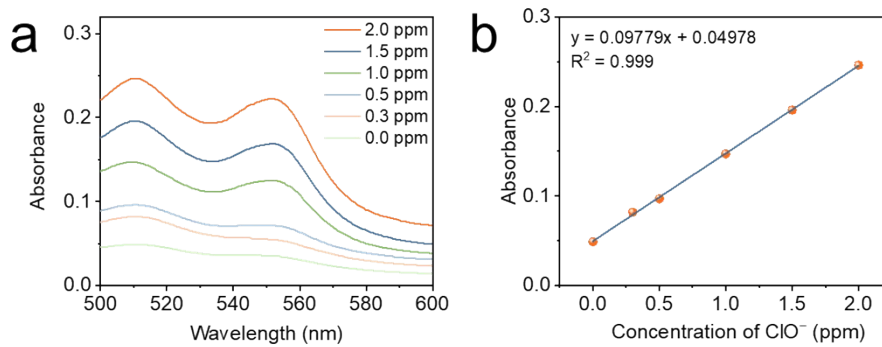

**Fig. S16.** (a) UV-vis absorption spectra of various active chlorine concentrations and (b) the corresponding linear fit.

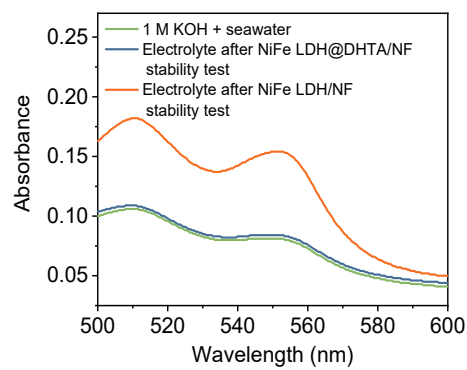

**Fig. S17.** UV-vis absorption spectra of electrolytes after the stability test.

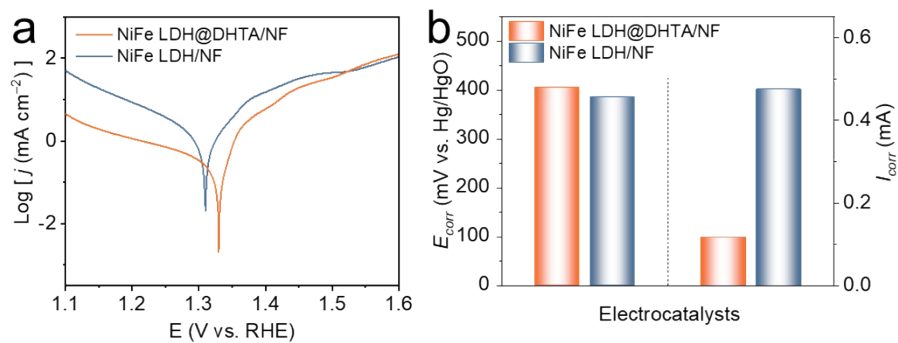

**Fig. S18.** (a) Corrosion behavior curves for the NiFe LDH@DHTA/NF and NiFe LDH/NF. (b) Comparison of  $E_{\text{corr}}$  and  $I_{\text{corr}}$  of NiFe LDH@DHTA/NF and NiFe LDH/NF in 1 M KOH + seawater.

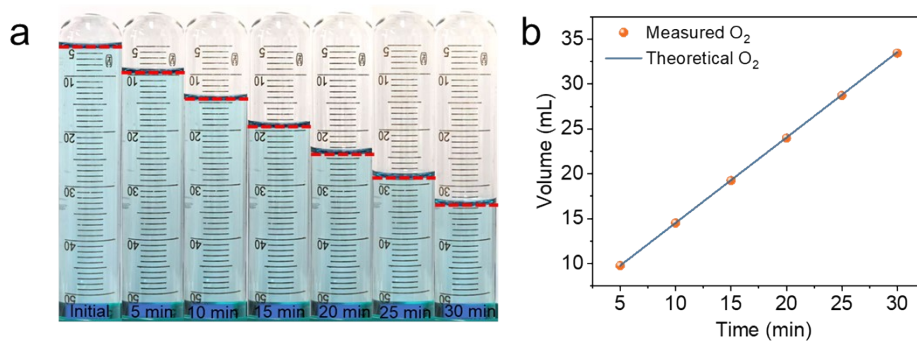

**Fig. S19.** (a) Collection of oxygen evolved from seawater oxidation at  $1000 \text{ mA cm}^{-2}$  by water drainage method. (b) The volume of  $\text{O}_2$ , including calculated theoretically and measured experimentally.

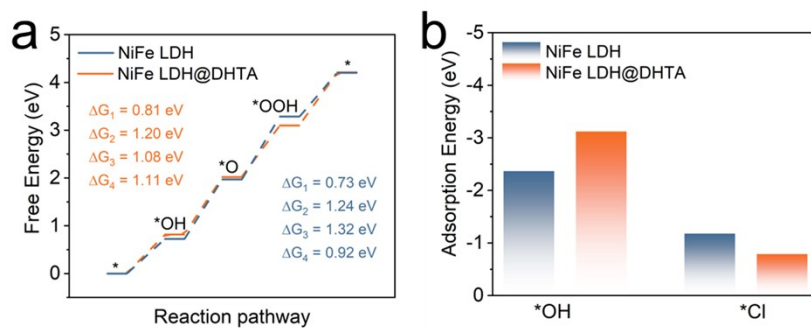

**Fig. S20.** (a) OER free-energy diagrams of NiFe LDH and NiFe LDH@DHTA. (b) Comparison of the adsorption energies of  $*OH$  and  $*Cl$  on NiFe LDH and NiFe LDH@DHTA surfaces.

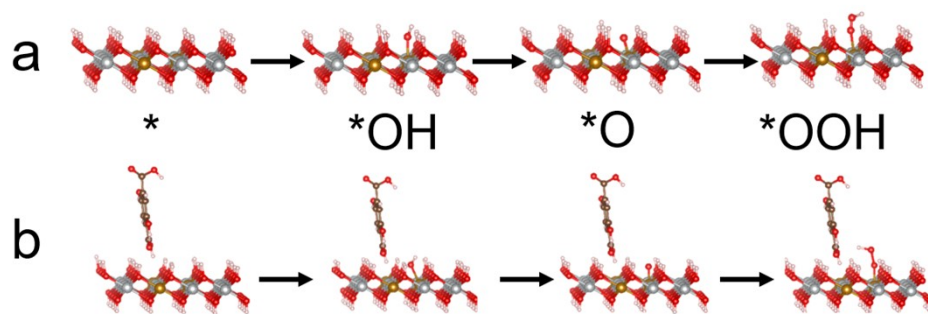

**Fig. S21.** Schematic illustration of the OER reaction pathways on NiFe LDH and NiFe LDH@DHTA. (a) The OER reaction pathway on bare NiFe LDH; (b) The OER reaction pathway on the DHTA-modified NiFe LDH interface.

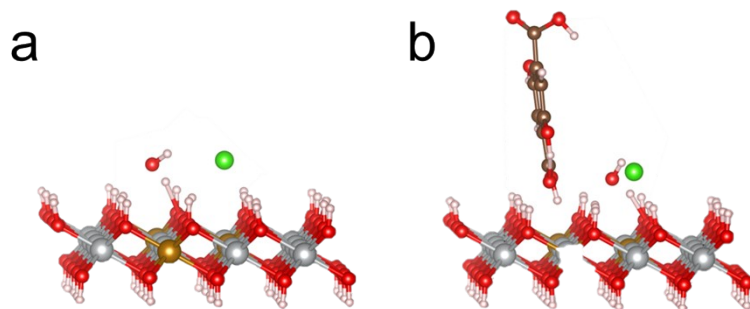

**Fig. S22.** Adsorption models of \*OH and \*Cl on the surfaces of NiFe LDH and NiFe LDH@DHTA. (a) Adsorption configuration on the NiFe LDH surface. (b) Adsorption configuration on the NiFe LDH@DHTA surface after modification with DHTA molecules.

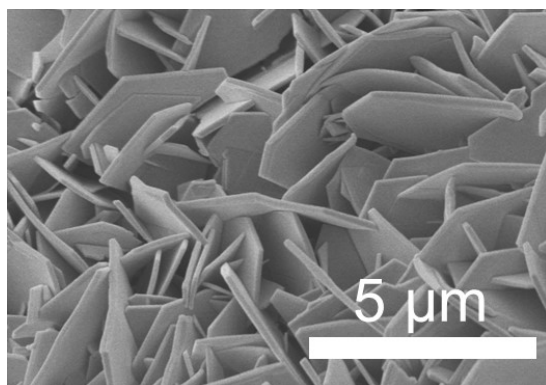

**Fig. S23.** SEM images of NiFe LDH@DHTA/NF after stability test in 1 M KOH + seawater.

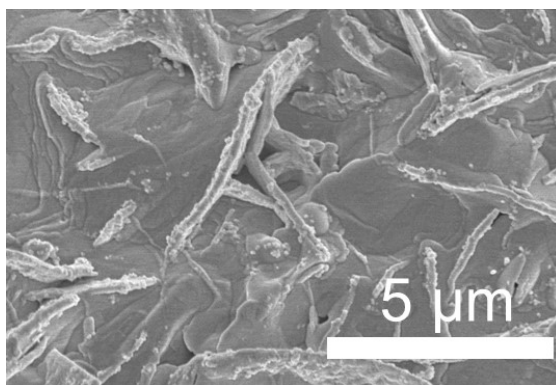

**Fig. S24.** SEM images of NiFe LDH/NF after stability test in 1 M KOH + seawater.

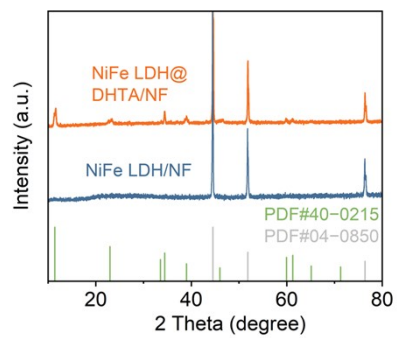

**Fig. S25.** XRD pattern of NiFe LDH@DHTA/NF and NiFe LDH/NF after stability test in 1 M KOH + seawater.

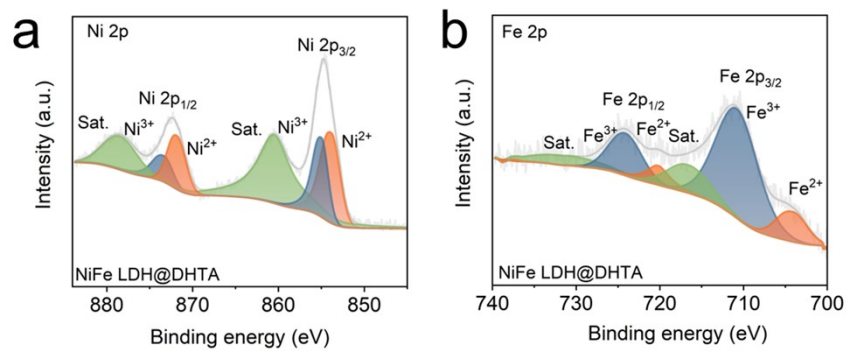

**Fig. S26.** XPS spectra of NiFe LDH@DHTA in the (a) Ni 2p and (b) Fe 2p regions after stability test in 1 M KOH + seawater.

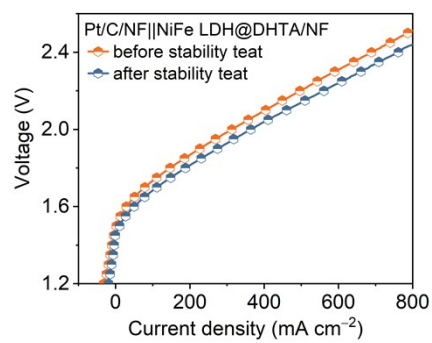

**Fig. S27.** Polarization curves of the Pt/C/NF||NiFe LDH@DHTA/NF alkaline seawater electrolyzer before and after the long-term stability test.

---

**Table S1.** EIS parameters of the samples.

| Catalysts        | $R_s/\Omega$ | $R_{ct}/\Omega$ |
|------------------|--------------|-----------------|
| NiFe LDH@DHTA/NF | 2.24         | 8.65            |
| NiFe LDH/NF      | 2.49         | 10.55           |

$R_s$ : solution resistance.

$R_{ct}$ : charge transfer resistance.

**Table S2.** Comparison of OER performance of NiFe LDH@DHTA/NF with reported electrocatalysts in 1 M KOH + seawater.

| Catalysts                                              | Current Density<br>(mA cm <sup>-2</sup> ) | Overpotential<br>(mV) | Ref.                                                               |
|--------------------------------------------------------|-------------------------------------------|-----------------------|--------------------------------------------------------------------|
| NiFe LDH@<br>DHTA/NF                                   | 500                                       | 334                   | This work                                                          |
|                                                        | 1000                                      | 370                   |                                                                    |
| FeMn-MOF                                               | 500                                       | 375                   | <i>Adv. Funct. Mater.</i> ,<br>2026, <b>36</b> , e08413            |
| NiFe LDH@<br>NiFe-CA/NF                                | 1000                                      | 387                   | <i>J. Colloid Interface<br/>Sci.</i> , 2025, <b>679</b> , 1–8      |
| NiFe-MOF@Ni <sub>2</sub> P<br>/Ni(OH) <sub>2</sub> /NF | 1000                                      | 394                   | <i>J. Colloid Interface<br/>Sci.</i> , 2023, <b>643</b> , 17–25    |
| NiFeO-CeO <sub>2</sub> /NF                             | 500                                       | 338                   | <i>ACS Nano</i> , 2023, <b>17</b> ,<br>16008–16019                 |
|                                                        | 1000                                      | 408                   |                                                                    |
| Fe-NiS/NF                                              | 500                                       | 377                   | <i>Inorg. Chem.</i> , 2023, <b>62</b> ,<br>7976–7981               |
|                                                        | 1000                                      | 420                   |                                                                    |
| S-(Ni,Fe)OOH/NF                                        | 500                                       | 398                   | <i>Energy Environ. Sci.</i> ,<br>2020, <b>13</b> , 3439–3446       |
| NiFe LDH@PP/NF                                         | 1000                                      | 390                   | <i>J. Mater. Chem. A</i> ,<br>2025, <b>13</b> , 25329–25334        |
| Ni <sub>2</sub> P-Fe <sub>2</sub> P/NF                 | 1000                                      | 431                   | <i>Adv. Funct. Mater.</i> ,<br>2021, <b>31</b> , 2006484           |
| MnCo/NiSe/NF                                           | 1000                                      | 460                   | <i>Appl. Catal. B:<br/>Environ.</i> , 2023, <b>325</b> ,<br>122355 |
| RuMoNi/NF                                              | 1000                                      | 470                   | <i>Nat. Commun.</i> , 2023,<br><b>14</b> , 3607                    |

|                                         |      |     |                                                            |
|-----------------------------------------|------|-----|------------------------------------------------------------|
| RuNi-Fe <sub>2</sub> O <sub>3</sub> /IF | 1000 | 497 | <i>Chin. J. Catal.</i> 2022,<br><b>43</b> , 2202–2211      |
| Ni <sub>3</sub> FeN@C/NF                | 500  | 394 | <i>J. Mater. Chem. A</i> ,<br>2021, <b>9</b> , 13562–13569 |
| Fe-NiO/MoO <sub>2</sub>                 | 500  | 338 | <i>Nano Energy</i> , 2024,<br><b>128</b> , 109921          |
|                                         | 1000 | 399 |                                                            |
| S-Cu <sub>2</sub> O-CuO                 | 1000 | 540 | <i>Catal. Today</i> , 2022,<br><b>400–401</b> , 14–25      |
| BZ-NiFe-LDH/CC                          | 500  | 610 | <i>Nano Res. Energy</i> ,<br>2022, <b>1</b> , e9120028     |

**Table S3.** Comparison of the electrochemical stability of NiFe LDH@DHTA/NF with reported ASO electrocatalysts.

| Catalyst                                     | Electrolyte        | Time (h)                       | Ref.                                                         |
|----------------------------------------------|--------------------|--------------------------------|--------------------------------------------------------------|
| NiFe LDH@DHTA/NF                             | 1 M KOH + seawater | 900 h@1000 mA cm <sup>-2</sup> | This work                                                    |
| NiFe LDH@PP/NF                               | 1 M KOH + seawater | 800 h@1000 mA cm <sup>-2</sup> | <i>J. Mater. Chem. A</i> , 2025, <b>13</b> , 25329–25334     |
| (NiFe)C <sub>2</sub> O <sub>4</sub> /NF      | 1 M KOH + seawater | 600 h@1000 mA cm <sup>-2</sup> | <i>Angew. Chem., Int. Ed.</i> , 2024, <b>63</b> , e202316522 |
| NiFe LDH@PCM/NF                              | 1 M KOH + seawater | 500 h@1000 mA cm <sup>-2</sup> | <i>Small</i> , 2025, <b>21</b> , 2408642                     |
| NiFe/MoC/NF                                  | 1 M KOH + seawater | 100 h@500 mA cm <sup>-2</sup>  | <i>ChemSusChem</i> , 2023, <b>16</b> , e202300984            |
| Mn-doped Ni <sub>2</sub> P/Fe <sub>2</sub> P | 1 M KOH + seawater | 200 h@500 mA cm <sup>-2</sup>  | <i>Chem. Eng. J.</i> 2023, <b>454</b> , 140061               |
| NiCoP foam/NF                                | 1 M KOH + seawater | 300 h@1000 mA cm <sup>-2</sup> | <i>J. Mater. Chem. A</i> , 2024, <b>12</b> , 2680–2684       |
| TS-NiFe LDH/NF                               | 1 M KOH + seawater | 350 h@1000 mA cm <sup>-2</sup> | <i>Small</i> , 2024, <b>20</b> , 2311431                     |
| R-CoNiPS                                     | 1 M KOH + seawater | 200 h@500 mA cm <sup>-2</sup>  | <i>J. Energy Chem.</i> , 2024, <b>94</b> , 508               |
| BZ-NiFe-LDH/CC                               | 1 M KOH + seawater | 100 h@500 mA cm <sup>-2</sup>  | <i>Nano Res. Energy</i> , 2022, <b>1</b> , e9120028          |
| NiMoS <sub>x</sub> @NiFe LDH/NF              | 1 M KOH + seawater | 500 h@500 mA cm <sup>-2</sup>  | <i>Inorg. Chem. Front.</i> , 2023, <b>10</b> , 2766–2775     |
| La-Ni(OH) <sub>2</sub> /NF                   | 1 M KOH + seawater | 200 h@500 mA cm <sup>-2</sup>  | <i>Catal. Sci. Technol.</i> , 2024, <b>14</b> , 2717–2721    |
| NiPO <sub>x</sub> @NiFe LDH/NF               | 1 M KOH + seawater | 600 h@1000 mA cm <sup>-2</sup> | <i>J. Colloid Interface Sci.</i> ,                           |

|                            |                       |                                   |                                                            |
|----------------------------|-----------------------|-----------------------------------|------------------------------------------------------------|
|                            | seawater              | mA cm <sup>-2</sup>               | 2025, <b>687</b> , 708–714                                 |
| CoP <sub>x</sub> @FeOOH/NF | 1 M KOH +<br>seawater | 80 h@500<br>mA cm <sup>-2</sup>   | <i>Nat. Commun.</i> , 2019, <b>10</b> ,<br>5106            |
| MCF-LDH                    | 1 M KOH +<br>seawater | 600 h@1000<br>mA cm <sup>-2</sup> | <i>Adv. Energy Mater.</i> , 2025,<br><b>15</b> , e03465    |
| NiIr-LDH/NF                | 1 M KOH +<br>seawater | 650 h@500 mA<br>cm <sup>-2</sup>  | <i>J. Am. Chem. Soc.</i> , 2022,<br><b>144</b> , 9254–9263 |

---

**Table S4.** Comparison of pH values and ion concentrations of the alkaline seawater (1 M KOH + seawater) before and after the long-term stability test.

| alkaline seawater     | PH    | K <sup>+</sup> | OH <sup>-</sup> | Na <sup>+</sup> | Cl <sup>-</sup> |
|-----------------------|-------|----------------|-----------------|-----------------|-----------------|
| before stability test | 13.99 | 1.00 M         | 0.97 M          | 0.53 M          | 0.52 M          |
| after stability test  | 14.23 | 1.74 M         | 1.70 M          | 0.88 M          | 0.86 M          |
